1     **Assessment of Environmental Factors Associated with Antibiotic**  
2             **Resistance Genes (ARGs) in the Yangtze Delta, China**

3

4             Jiazheng Miao<sup>1</sup>, Yikai Ling<sup>1</sup>, Xiaoyuan Chen<sup>1</sup>, Siyuan Wu<sup>1</sup>, Sajid Umar<sup>2</sup>, Shixin  
5                             Xu<sup>1,2,\*</sup>, Benjamin D. Anderson<sup>1,2,3,\*</sup>

6

7     <sup>1</sup> Division of Natural and Applied Science, Duke Kunshan University, Kunshan,  
8     Jiangsu, China

9     <sup>2</sup> Global Health Research Center, Duke Kunshan University, Kunshan, Jiangsu,  
10    China

11    <sup>3</sup> Department of Environmental and Global Health, College of Public Health and  
12    Health Professions, and Emerging Pathogens Institute, University of Florida,  
13    Gainesville, Florida, United States

14    \* Shixin Xu and Benjamin D. Anderson serve as co-corresponding authors

15

16    **\*Corresponding Authors:**

17    **Benjamin D. Anderson, MPH, PhD, CPH**

18    Assistant Professor

19    Department of Environmental and Global Health, College of Public Health and  
20    Health Professions, and Emerging Pathogens Institute, University of Florida,  
21    Gainesville, Florida, 32610 United States

22    Email: [ander88@ufl.edu](mailto:ander88@ufl.edu)

23

24    **Shixin Xu, PhD**

25    Assistant Professor of Mathematics

NOTE: This preprint reports new research that has not been certified by peer review and should not be used to guide clinical practice.

26 Division of Natural and Applied Science, Duke Kunshan University, Kunshan,  
27 Jiangsu, 215300, China  
28 Global Health Research Center, Duke Kunshan University, Kunshan, Jiangsu,  
29 215300, China  
30 Email: [shixin.xu@dukekunshan.edu.cn](mailto:shixin.xu@dukekunshan.edu.cn)  
31

32 **Abstract**

33 The emergence of antimicrobial resistance (AMR) is an urgent and complex public  
34 health challenge worldwide. As a sub-problem of AMR, antibacterial resistance  
35 (ABR) is of particular concern due to inadequacy of alternative medication. Earlier  
36 studies have shown that ABR is not only impacted by antibiotics, but also affected by  
37 the interactions between bacteria and their environments. Therefore, to combat ABR  
38 in a specific region, local environmental conditions must be investigated to  
39 comprehensively understand which environmental factors might contribute to ABR  
40 and propose more tailored solutions. This study surveyed environmental contributors  
41 of antibiotic resistance genes (ARGs), the parameter for measuring ABR, in the  
42 Yangtze Delta. A high abundance of ARGs was detected, despite low antibiotic and  
43 heavy metal concentrations. Phosphorus, chromium, manganese, calcium, and  
44 strontium were identified as potential key contributors of ARGs. Suppression of  
45 ARGs could be realized through decreasing the concentration of phosphorus in  
46 surface water. Group 2A light metals (e.g., magnesium and calcium) could be  
47 developed as eco-friendly reagents for controlling antibiotic resistance in the future.

48

49 **Keywords:** antimicrobial resistance, antibiotic resistance genes, antibiotic residues,  
50 dissolved metal, surface water, environmental health

51

## 52 **1. Introduction**

53 Antimicrobial resistance (AMR) refers to the process by which bacteria, parasites,  
54 viruses, and fungi evolve mechanisms that protect them from drugs [1]. Due to the  
55 increasing prevalence, health effects, and economic impact of AMR, World Health  
56 Organization has characterized AMR as “a complex global public health challenge”  
57 (p. XIX) that requires urgent action [1]. Among the concerns about AMR,  
58 countermeasures against antibacterial resistance (ABR) are of particular urgency  
59 because of severe inadequacy of alternative therapeutic options [1]. In 2019, it is  
60 estimated that 4.95 million deaths were associated with ABR, and 1.27 million  
61 deaths were attributable to ABR [2]. In a recent study that estimates the economic  
62 burden of ABR in China, 27.45% of inpatient bacterial infection were antibiotic  
63 resistant, which is estimated to have caused a 1.5% increase in inpatient mortality  
64 rates and cost \$77 billion in related societal expenses in 2017 [3]. What is worse,  
65 bacteria are even capable of spreading ABR at a high rate through exchanging  
66 ARGs in horizontal gene transfer (HGT) [4]. ARGs are a group of genes that encode  
67 the proteins responsible for resisting antibiotics and are frequently carried on mobile  
68 genetic elements (MGEs) like plasmids, transposons and integrons [4]. In HGT, one  
69 bacterial cell transfer its MGEs to other bacterial cells, facilitating environmental  
70 dispersal of the ARGs [4]. Thus, ARG has also been recognized as a new  
71 environmental pollutant that poses a threat to human health [4].

72 Earlier studies have attempted to suppress ABR by reducing antibiotic use to  
73 allow non-resistant bacteria to outcompete resistant bacteria [5-7], but reversibility  
74 only occurs at a slow rate. Later studies demonstrate a strong association between  
75 ABR and environmental factors [8]. In particular, heavy metals are reported to have a  
76 co-selection effect on ARGs [9-11]. Because bacteria resist antibiotics and heavy

77 metals through similar strategies (e.g., reduction in permeability, efflux,  
78 sequestration, etc.), heavy metals may also pose a selective pressure on ARGs.  
79 Furthermore, antibiotic resistant communities in urban lakes have also been  
80 identified to be more competitive than non-resistant communities at higher  
81 temperatures, but less competitive at higher concentration of magnesium or salinity  
82 [8].

83 Therefore, to effectively understand and mitigate ABR in a specific region, local  
84 environmental conditions must be investigated.

85 The Yangtze Delta is one of the most economically developed regions in China. It  
86 consists of 26 cities including Shanghai City, southern part of Zhejiang Province, and  
87 northern part of Jiangsu province [12]. In 2018, 154 million people were reported to  
88 permanently resides in this area at a high population density of 720 persons/square  
89 kilometre [12]. The hygiene of drinking water source in this area (e.g., Yangcheng  
90 Lake in Suzhou and Huangpu River in Shanghai) is of vital importance since the  
91 water sources provide drinking water for over 150 million residents. Due to its  
92 economic and environmental importance, previous studies have investigated the  
93 prevalence of ARGs and patterns of antibiotic use in the area.

94 In 2020, 64 out of 69 types of antibiotics monitored in the surface water in China  
95 can be detected in Shanghai, indicating the widespread of antibiotics in the surface  
96 water of Shanghai, with concentrations ranging from a few  $\text{pg L}^{-1}$  to hundreds  $\text{ng L}^{-1}$   
97 [13-15]. While confirming the widespread distribution and persistence of antibiotics,  
98 these studies estimate low environmental risks for most types of antibiotics [14, 16]  
99 by calculating their hazard quotients[17]. However, the environmental risks of  
100 enrofloxacin, amoxicillin and oxytetracyclines to aquatic organisms, represented by  
101 the risk quotient method [18, 19], are distinctly higher than those in other countries

102 [14]. As for ARGs, tetracycline resistance genes (*tet*) and sulfonamide resistance  
103 genes (*sul*) exist in most waterbodies in Yangtze Delta, and  $\beta$ -lactam resistance  
104 genes also exist in some regions [20, 21]. For *sul* and *tet* genes, the detection  
105 frequency of *sull*, *sulll*, *tetA*, *tetG*, *tetM* and *tetO* were significantly higher than *sullll*,  
106 which was still significantly higher than *tetC* [21]. It was observed that samples with  
107 more *sul* genes tend to contain higher levels of total sulfonamides, and the same  
108 relationship can be applied to *tet* genes [20].

109 While these studies focus on the link between ARGs and antibiotic detection.  
110 Limited studies have investigated how ARGs are influenced by environmental  
111 factors. In this study, we tested surface water samples for ARGs, antibiotics, and  
112 dissolved elements to better understand what environmental factors might contribute  
113 to the prevalence of ARGs in main water bodies in the Yangtze Delta.

114

## 115 **2. Methods**

### 116 *2.1 Sampling Sites and Sample Collection*

117 In 2021, surface water samples were collected from sampling sites located along  
118 a watershed starting at Yangcheng Lake in Suzhou, running along the Wusong  
119 River, passing Dianshan Lake in Shanghai, running along the Huangpu River in  
120 Shanghai, and ending at an estuary at the Shanghai coastal area. The watershed  
121 connects most of the main water bodies in Suzhou and Shanghai. The sampling  
122 area contained four subregions: Dianshan Lake (Qingpu District, Shanghai),  
123 Huangpu River (Songjiang District, Shanghai), estuary (Jinshan District, Shanghai),  
124 and Kunshan (Suzhou).

125 Surface water samples were collected using brown HDPE bottles (NINGKE,  
126 China) that were dipped into the top 10cm of the water body with the goal of  
127 collecting 1000ml of water. Water temperature, salinity, and pH of the collected

128 samples were immediately measured and recorded using a salinity and pH meter  
129 (BANTE, China) according to the manufacturer's instructions. Sample bottles were  
130 transported on wet ice within 3 hours to Duke Kunshan University where 650ml of  
131 each sample was filtered through a 0.45  $\mu\text{m}$  glass microfiber filter membranes (Titan,  
132 China). The filtrate and filter membranes were stored stored at a  $-80^{\circ}\text{C}$  freezer.

133

## 134 2.2 Measurement of ARGs

135 Cells gathered on the filter membrane were first released in 10ml of ultrapure  
136 water. A TaKaRa MiniBEST Bacteria Genomic DNA Extraction Kit was used to  
137 extract 240 $\mu\text{l}$  of DNA from 10ml of stored sample, according to the manufacturer's  
138 instructions. Quantitative PCR was used to screen extracts for ARGs using the  
139 SYBR Green Real-Time PCR assay (TaKaRa Co. Dalian, China) on a Mic qPCR  
140 Cycler (BioMolecular Systems, El Cajon, CA), according to the manufacturer's  
141 instructions. One sample was randomly selected from each of the four subregions. A  
142 total of 26 primers for ARGs were used to screen the four samples. The ARGs  
143 include 15 tetracycline resistance genes (*tetA*, *tetC*, *tetE*, *tetK*, *tetL*, *tetA/P*, *tetG*,  
144 *tetM*, *tetO*, *tetQ*, *tetS*, *tetT*, *tetW*, *tetBP*, and *tetX*), 4  $\beta$ -lactam resistance genes  
145 (*bla<sub>CTX-M</sub>*, *bla<sub>TEM</sub>*, *bla<sub>SHV</sub>*, and *bla<sub>ampC</sub>*), 3 sulfonamide resistance genes (*sull*, *sullI*,  
146 and *sullII*), 3 macrolides resistance genes (*ereA*, *ereB*, and *mphA*), and 1 beta-  
147 lactam resistance gene. Primer sequences and cycling conditions for the quantitative  
148 PCR experiments are listed in Table S1. Cultured environmental samples were used  
149 as positive controls.

150 Based on the ARG screening results (Figure S1a and Figure S1b), the three most  
151 abundant ARGs were selected for further quantitative PCR experiments: *tetBP*,

152 *ampr*, *tetO*. Each gene was commercially synthesized and used as an internal  
153 standard to determine absolute abundance.

154

### 155 *2.3 Measurement of Dissolved Elements Concentrations*

156 After filtration, approximately 150ml of stored filtrate was acidified to pH < 2 by  
157 (1+1) nitric acid and preserved at -80 °C freezer. The samples were sent to the  
158 Nanjing Institute of Geography & Limnology, Chinese Academy of Sciences and  
159 measured for Ca, K, Mg, Na, Si, Ag, Hg, Tl, Al, As, B, Ba, Be, Cd, Co, Cr, Cu, Fe,  
160 Mn, Mo, Ni, P, Pb, Sb, Se, Sn, Sr, Ti, V, and Zn by ICP-MS 7900 (Agilent, US), as  
161 described in [22].

162

### 163 *2.4 Measurement of Antibiotic Concentration*

164 Concentrations of amoxicillin and tetracycline were measured using 500 mL of  
165 stored filtrate using the Amoxicillin ELISA kit (Shenzhen Lvshiyuan Biotechnology  
166 Co., Ltd, China) and Tetracycline ELISA kit (Shenzhen Lvshiyuan Biotechnology Co.,  
167 Ltd, China), according to the manufacturer's instructions. The procedures of the two  
168 kits were technically the same. Briefly, samples and standard solutions with known  
169 antigen (amoxicillin/tetracycline) concentration were separately mixed with  
170 corresponding enzyme conjugates (enzyme-labelled antibodies) on a micro-well  
171 plate where micro-well strips were pre-coated with coupling antigens. The antigens  
172 in the sample and the coupling antigens would compete for the enzyme conjugates.  
173 After removing the mixed solution and adding TMB substrate for coloration, the  
174 enzyme conjugates bound with sample antigens were removed and only those  
175 bound with pre-coated antigens remained, which led to higher optical density (OD)  
176 value in the sample with lower antigen concentration. The OD values of the solutions



177 generated from samples and standard solutions were measured with the wavelength  
178 of 450nm. All procedures above were performed in duplicate for each sample and  
179 standard solution. A standard curve of absorption versus antigen concentration was  
180 generated with the OD values from the standard solutions, and the OD values from  
181 the samples were compared to the standard curve to get the antigen concentration.  
182

### 183 *2.5 Environmental Risk Assessment of Antibiotics*

184 To assess the potential risk of antibiotics in the environment, a hazard quotient  
185 (HQ) was used, which is the ratio between the measured environmental  
186 concentration (MEC) of the antibiotic and the predicted no-effect concentration  
187 (PNEC) [17]. HQ values >1.0 indicate a potential risk to the aquatic system [23]. This  
188 study adopts PNEC values proposed by Bengtsson-Palme and Larsson, 2016 (0.25  
189 µg/L for amoxicillin and 1 µg/L for tetracycline) [24].

190

### 191 *2.6 Statistical Method*

192 ARG screening data was calculated to relative abundance using the median C<sub>q</sub>  
193 value of *tetE* in Sample S7 as a reference with the following formula:

194

$$195 \text{ Relative Abundance} = 2^{(C_{q_{\text{reference}}} - C_q)}$$

196

197 *TetBP*, *ampr*, and *tetO* qPCR data was calculated to absolute abundance using a  
198 standard curve derived by serially diluting (10-fold) synthetic genes at a range of 10<sup>12</sup>  
199 copies/mL to 10<sup>2</sup> copies/mL.

200 Concentrations of amoxicillin and tetracycline were calculated using a standard  
201 curve derived from standard solutions provided in the commercial kits.

202 All figures were generated using R (version 4.0 and 4.1). Figure 1(a) used  
203 country border data and river data from the *naturalearth* package. Population  
204 density data was collected by the Ministry of Civil Affairs of the People's Republic of  
205 China [25] and Statistical Bureau of Republic of China [26]. Figure 1(b) adopted the  
206 Stamen map through the *ggmap* package.

207 Phosphorus, chromium, manganese, calcium, and strontium were used to predict  
208 *tetBP*, *ampr*, and *tetO* abundance through ridge regression. Ridge regression is an  
209 algorithm that produces stable estimation of the least-squares coefficients of  
210 multiple-regression models with the condition of high collinearity [27]. Because *tetBP*  
211 contained an outlier with an abundance several magnitudes higher than the others,  
212 *tetBP* was re-scaled through the calculation of  $\log_{10}(\text{Abd}+1)$ .

213

### 214 **3. Results**

#### 215 *3.1 Abundance of Antibiotic Resistance Genes*

216 The spatial distribution of the samples and absolute abundance of total ARG  
217 (sum of *tetBP*, *ampr*, *tetO*) are shown in Figure 1. Notably, an ARG hotspot (S10)  
218 was found in Yangcheng Lake, Kunshan. The hotspot contains an elevated amount  
219 of *tetBP* (Figure S1).

220 The mean absolute abundance and composition of ARGs in the four regions are  
221 shown in Figure 2. The ARG *ampr* accounts for the majority of detected  
222 concentrations in all the regions. However, all the results shown a large standard  
223 deviation, indicating high variability within each region.

224

#### 225 *3.2 Dissolved Elements & Water Quality*

226 In general, all of the samples had a very low heavy metal concentration as shown  
227 in Table 1 (according to the Environmental Quality Standard for Surface Water of  
228 People's Republic of China [28]). However, Sample S8 collected from drinking water  
229 reserve in Songjiang District, Shanghai had an iron concentration of 417.436 µg/L  
230 that exceeds the standard limit of 300 µg/L (Table 2). Moreover, though the  
231 concentration of phosphorus in many samples was relatively high (Table 1), the  
232 values were still under the standard limits. One exception again was the Songjiang  
233 sample (237.872 µg/L) which exceeds the phosphorus limit of 200 µg/L for drinking  
234 water (Table 1).

235

### 236 *3.3 Measurement of Antibiotic Concentration and Risk Assessment*

237 Antibiotic concentrations are shown in Table 3. Unexpectedly, except for the  
238 sample from Jinshan contains 0.13 µg/L of tetracycline, antibiotics were not detected  
239 in any other samples. Also, the HQ value tetracycline concentration in Jinshan is  
240 0.13, indicating no risk.

241

### 242 *3.4 Correlation of ARGs and Environmental Risk Factors*

243 Figure 3 shows the correlation of ARGs with salinity, temperature, and dissolved  
244 elements. Water temperature and salinity show weak to little correlation with ARGs.  
245 pH appears to have a weak negative correlation with *tetO* and *ampR* ( $r = -0.58, -$   
246  $0.55$ ). Interestingly, phosphorus, chromium, and manganese exhibit a strong positive  
247 correlation with *tetO* ( $r = 0.79, 0.64, 0.63$ ). Calcium has a strong negative correlation  
248 with *ampR* ( $r = -0.70$ ). And strontium has strong negative correlation with both *tetO*  
249 and *ampR* ( $r = -0.71, -0.70$ ). Linear regression of *tetO* and *ampR* with phosphorus,  
250 chromium, manganese, calcium, and strontium is shown in Figure 4. These five

251 elements explain 71.2% variability of *amp<sup>r</sup>*, 79.1% variability of *tetO*, and 36.0%  
252 variability of log-scaled *tetBP*, in a ridge regression model.

253

#### 254 **4. Discussion**

255 This study aims to understand what environmental factors might contribute to the  
256 prevalence of ARGs in main water bodies in the Yangtze Delta. In summary, a high  
257 abundance of ARGs was detected and several dissolved elements (phosphorus,  
258 chromium, manganese, calcium, and strontium) were potentially key contributors of  
259 ARGs.

260

##### 261 *4.0 Interpretation of the abundance of ARGs*

262 As shown in Figure 1 and Figure 2, a high abundance of ARGs was detected.  
263 Compared with historical data of Huangpu River collected in July 2013 [29], the  
264 ARGs abundance in Huangpu River detected in this study was several magnitudes  
265 higher. Specifically, historical data shows that the abundance of tetracycline-resistant  
266 genes was at the magnitude of 10 to 10<sup>4</sup> copies/mL [29], but in this study *tetO*  
267 abundance in Huangpu River reached up to 10<sup>6</sup> copies/mL (Figure 2). The hotspot  
268 sample from Yangcheng Lake, Kunshan, contained *tetBP* at the magnitude of 10<sup>8</sup>  
269 copies/mL (Figure 1). This finding suggests there could have been a surge of  
270 antibiotic resistant bacteria in the Yangtze Delta during the past decade.

271 What is more, the hotspot and large standard deviations of ARG concentrations  
272 imply that there might be point sources of ARG pollution, which elevated ARG  
273 concentrations locally (e.g., hotspot of Sample S10), but could not disperse over a  
274 wide area.

275

#### 276 4.1 ARGs and Antibiotics

277 In contrast with the detection of ARGs, antibiotic measurement results indicate  
278 that antibiotic persistence in the environment was limited, with ELISA results  
279 showing that all samples contained less than 1 µg/L of amoxicillin and tetracycline  
280 (Table 3). This finding is consistent with other studies that show antibiotic  
281 concentrations in surface water in Shanghai is at the magnitude of ng/L [13-15, 29-  
282 31]. This indicates, despite low antibiotic risk, ARGs remain persistent in the aquatic  
283 system.

284 Notably, persistence of tetracycline resistance was also reported in coastal  
285 regions of Southeast China, which is geologically close to this study's sampling  
286 region [32]. Though other mechanisms may also contribute to persistence of  
287 tetracycline resistance (e.g., compensatory evolution), existing evidence supports  
288 co-selection between resistance genes is the most likely cause of persistence of  
289 tetracycline resistance [6], which will be discussed in following parts.

290 Additionally, it is worth noting that overall antibiotic levels in the Yangtze Delta  
291 were observed to vary in accordance to seasons, with the number of detected  
292 antibiotics and their detection frequencies being significantly lower in summer than in  
293 winter [14, 15, 33, 34], except for tetracyclines [34]. The high flow conditions in  
294 summer might dilute the concentration of antibiotics in the surface water [35], and  
295 faster degradation of antibiotics in summer could also contribute to the low  
296 concentration of antibiotics detected [34, 36]. The results of this study do not  
297 guarantee a risk of antibiotics during the winter.

298 Though the correlation coefficient of ARGs and antibiotics cannot be calculated,  
299 considering the low level of antibiotic concentrations, it might be more prudent to

300 focus on direct remediation strategies for removing ARGs, instead of focusing only  
301 on decreasing antibiotic contamination in surface water of the Yangtze Delta.

302

#### 303 *4.2 ARGs and Nonmetal Elements*

304 As shown in Figure 3 and Figure 4, phosphorus exhibits a strong positive  
305 correlation with *tetO*. One possible explanation for this correlation is that  
306 phosphorus, as an essential biological element, enriches bacterial growth in  
307 freshwater [37, 38]. The abundance of ARGs proliferate as the quantity of bacterial  
308 cells increases. This positive connection between phosphorus and ARGs is also  
309 reported by other studies in eutrophic environment [39, 40]. Though additional  
310 assessment is needed to better understand the relationship between phosphorous  
311 concentrations and ARG, the findings seem to suggest that regulating phosphorous  
312 eutrophication could be a practical approach to manage ARG development in  
313 surface water. One similar proposal is also given by Wang et al. 2020 [40].

314

#### 315 *4.3 ARGs and Heavy Metals*

316 As shown in Figure 3 and Figure 4, chromium and manganese exhibit a strong  
317 positive correlation with *tetO*. The positive correlation of chromium could be a result  
318 of co-selection between tetracycline-resistant genes and chromium-resistant genes  
319 though co-resistance mechanism. Co-resistance describes the spatial association of  
320 HMRGs and ARGs when they are located on the same genetic elements, such as  
321 plasmids and transposons. This association means either heavy metals or antibiotics  
322 can be the selection pressure for both resistance genes. A previous study cured  
323 plasmids from *Salmonella abortus equi* strains and found the plasmids were resistant  
324 to ampicillin, arsenic, chromium, cadmium and mercury simultaneously [41].

325 However, co-selection of manganese and ARGs is rarely reported. Further research  
326 is needed to confirm whether manganese truly has co-selective pressure on ARGs.

327

#### 328 *4.4 ARGs and Light Metals*

329 A negative correlation was found between *amp<sup>r</sup>* and calcium, and strontium had  
330 a strong negative correlation with both *tetO* and *amp<sup>r</sup>* (Figure 3 & Figure 4).

331 Interestingly, as noted, a previous study reported magnesium (Mg) could suppress  
332 resistant bacterial community [8]. Magnesium, calcium, and strontium all belong to  
333 Group 2A on the periodic table. This means the three elements have similar  
334 chemical properties, so it is possible that the three elements have a potential  
335 inhibition effect on ARG through similar mechanisms.

336 Although negative correlation of strontium may be explained by its cytotoxicity on  
337 bacteria [42, 43], molecular biology studies have reported selective inhibition effects  
338 of magnesium and calcium on antibiotic-resistant bacteria. Magnesium and calcium  
339 may involve directly in the destabilization of the *Staphylococcus aureus* cell  
340 membrane [44]. Calcium and magnesium can form a complex with Cardiolipin (CL),  
341 one major component of the bacterial cell membrane, thus destabilizing the cell  
342 membrane and eventually causing cell death [44]. In addition, calcium could  
343 suppress bacterial growth through inhibiting peptidoglycan-layer (PG-layer) synthesis  
344 or destabilizing the cell membrane. PG-layer synthesis involves transpeptidase (TP)  
345 enzymes, including D,D-TP and L,D-TP. These TP enzymes are the target of many  
346 antibiotic  $\beta$ -lactams [45]. Calcium hinders the binding of L,D-TP to PG-stem by  
347 inducing the formation of L,D-TP dimer [45].

348 This finding reveals the possibility of developing Group 2A light metals as  
349 reagents to control ABR. For example, as one of the major elements in nature,

350 calcium salts are of low toxicity and eco-friendly. Calcium-based reagent might be  
351 capable of suppressing antibiotic resistant bacteria in natural environment if added to  
352 natural surface water (e.g., exposure recreational water).

353

#### 354 *4.5 Limitations*

355 Considering the reported seasonal variance in antibiotic concentrations [14, 15,  
356 33, 34], the findings on antibiotic concentrations can only be generalizable to surface  
357 water of the Yangtze Delta in summer. Also, impacted by the outbreak of COVID-19  
358 Delta strain in China in 2021 Summer, the sampling stage of this study was  
359 emergently terminated, ahead of schedule. The unexpected termination led to a  
360 small sample size (15 samples). The small sample size decreases statistical power  
361 and increases potential error in the results. Finally, ARG concentrations were of  
362 large standard deviations in all four subregions. Though this could be explained as  
363 indication of point sources of ARG pollution, one alternative explanation is there was  
364 degradation of DNA during the experiments.

365

#### 366 **5. Conclusion**

367 This study detected a high abundance of ARGs in surface water samples  
368 collected from the Yangtze Delta, despite corresponding low antibiotic and low heavy  
369 metal concentration. Phosphorus, chromium, manganese, calcium, and strontium  
370 were identified as potential key contributors of ARGs in the Yangtze Delta. Reduction  
371 of ARG abundance could be realized through decreasing the concentration of  
372 phosphorus in surface water. In addition, Group 2A light metals (e.g., magnesium  
373 and calcium) were identified to have a potential ARG suppression effect, though  
374 future studies are still needed to further evaluate this association.



375

376 **6. Acknowledgements**

377 The authors thank Dr. Huansheng Cao for providing the positive controls for the  
378 quantitative PCR experiments and thank Dr. Yingxue Li for her help in measuring the  
379 antibiotic concentrations.

380 This work was funded by Interdisciplinary Health Research Fund at the Global  
381 Health Research Center, Duke Kunshan University, Kunshan, China.

## 382 **References**

- 383 1. Antimicrobial Resistance: Global Report on Surveillance. Geneva: WHO Press, **2014**.
- 384 2. Murray CJL, Ikuta KS, Swetschinski L, et al. Global burden of bacterial antimicrobial  
385 resistance in 2019: a systematic analysis. *The Lancet (British edition)* **2022**;  
386 399(10325): 629-55.
- 387 3. Zhen X, Stålsby Lundborg C, Sun X, Zhu N, Gu S, Dong H. Economic burden of  
388 antibiotic resistance in China: a national level estimate for inpatients. *Antimicrob  
389 Resist Infect Control* **2021**; 10(1): 5.
- 390 4. Tripathi V, Tripathi P. Antibiotic Resistance Genes: An Emerging Environmental  
391 Pollutant. In: Kesari KK. *Perspectives in Environmental Toxicology*. Cham: Springer  
392 International Publishing, **2017**:183-201.
- 393 5. Andersson DI, Hughes D. Antibiotic resistance and its cost: is it possible to reverse  
394 resistance? *Nature Reviews Microbiology* **2010**; 8(4): 260-71.
- 395 6. Andersson DI, Hughes D. Persistence of antibiotic resistance in bacterial  
396 populations. *FEMS Microbiol Rev* **2011**; 35(5): 901-11.
- 397 7. Sundqvist M. Reversibility of antibiotic resistance. *Ups J Med Sci* **2014**; 119(2): 142-  
398 8.
- 399 8. Wang Q, Hamilton PB, Kang F, Zhu X, Zhang Y, Zhao H. Regional-scale  
400 investigation for microbial competition-through-environment interactions modulating  
401 antibiotic resistance. *Sci Total Environ* **2020**; 734: 139341.
- 402 9. Baker-Austin C, Wright MS, Stepanauskas R, McArthur JV. Co-selection of antibiotic  
403 and metal resistance. *Trends Microbiol* **2006**; 14(4): 176-82.
- 404 10. Chen J, Li J, Zhang H, Shi W, Liu Y. Bacterial Heavy-Metal and Antibiotic Resistance  
405 Genes in a Copper Tailing Dam Area in Northern China. *Frontiers in Microbiology*  
406 **2019**; 10.
- 407 11. Di Cesare A, Eckert E, Corno G. Co-selection of antibiotic and heavy metal  
408 resistance in freshwater bacteria. *Journal of Limnology* **2016**; 75(s2).

- 409 12. Xu Z, Yin Y. Regional Development Quality of Yangtze River Delta: From the  
410 Perspective of Urban Population Agglomeration and Ecological Efficiency  
411 Coordination. *Sustainability* **2021**; 13(22).
- 412 13. Zhu F, Wang S, Liu Y, Wu M, Wang H, Xu G. Antibiotics in the surface water of  
413 Shanghai, China: screening, distribution, and indicator selecting. *Environmental*  
414 *Science and Pollution Research* **2021**; 28(8): 9836-48.
- 415 14. Wu M, Que C, Tang L, et al. Distribution, fate, and risk assessment of antibiotics in  
416 five wastewater treatment plants in Shanghai, China. *Environmental Science and*  
417 *Pollution Research* **2016**; 23(18): 18055-63.
- 418 15. Pan C, Bao Y, Xu B. Seasonal variation of antibiotics in surface water of Pudong  
419 New Area of Shanghai, China and the occurrence in typical wastewater sources.  
420 *Chemosphere* **2020**; 239: 124816.
- 421 16. Wang H, Yang J, Yu X, et al. Exposure of Adults to Antibiotics in a Shanghai  
422 Suburban Area and Health Risk Assessment: A Biomonitoring-Based Study.  
423 *Environmental Science & Technology* **2018**; 52(23): 13942-50.
- 424 17. Grung M, Källqvist T, Sakshaug S, Skurtveit S, Thomas KV. Environmental  
425 assessment of Norwegian priority pharmaceuticals based on the EMEA guideline.  
426 *Ecotoxicology and Environmental Safety* **2008**; 71(2): 328-40.
- 427 18. Hu Y, Yan X, Shen Y, Di M, Wang J. Antibiotics in surface water and sediments from  
428 Hanjiang River, Central China: Occurrence, behavior and risk assessment.  
429 *Ecotoxicology and Environmental Safety* **2018**; 157: 150-8.
- 430 19. Wu M-H, Que C-J, Xu G, et al. Occurrence, fate and interrelation of selected  
431 antibiotics in sewage treatment plants and their receiving surface water.  
432 *Ecotoxicology and Environmental Safety* **2016**; 132: 132-9.
- 433 20. Jiang L, Hu X, Xu T, Zhang H, Sheng D, Yin D. Prevalence of antibiotic resistance  
434 genes and their relationship with antibiotics in the Huangpu River and the drinking  
435 water sources, Shanghai, China. *Science of The Total Environment* **2013**; 458-460:  
436 267-72.

- 437 21. Yang Y, Liu W, Xu C, Wei B, Wang J. Antibiotic resistance genes in lakes from  
438 middle and lower reaches of the Yangtze River, China: Effect of land use and  
439 sediment characteristics. *Chemosphere* **2017**; 178: 19-25.
- 440 22. Zi XY, Zhang M, Gu XH, et al. Impact of Enclosure Culture on Heavy Metal Content  
441 in Surface Sediments of Hongze Lake and Ecological Risk Assessment. *Huanjing*  
442 *Kexue/Environmental Science* **2021**; 42(11): 5355-63.
- 443 23. López-Serna R, Postigo C, Blanco J, et al. Assessing the effects of tertiary treated  
444 wastewater reuse on the presence emerging contaminants in a Mediterranean river  
445 (Llobregat, NE Spain). *Environmental Science and Pollution Research* **2012**; 19(4):  
446 1000-12.
- 447 24. Bengtsson-Palme J, Larsson DGJ. Concentrations of antibiotics predicted to select  
448 for resistant bacteria: Proposed limits for environmental regulation. *Environment*  
449 *International* **2016**; 86: 140-9.
- 450 25. Statistical list of administrative divisions of the People's Republic of China in 2020  
451 [Chinese]. In: *China MoCAotPsRo*, **2020**.
- 452 26. Population density (end of year, persons per square kilometer). In: *China SBoRo*.  
453 *National Statistics*, **2020**.
- 454 27. Hoerl AE, Kennard RW. Ridge Regression: Biased Estimation for Nonorthogonal  
455 Problems. *Technometrics* **1970**; 12(1): 55-67.
- 456 28. Environmental quality standard for surface water [Chinese]. In: *ENVIRONMENT*  
457 *MOEA, CHINA TPSRO*, **2002**.
- 458 29. Jiang L, Hu X, Xu T, Zhang H, Sheng D, Yin D. Prevalence of antibiotic resistance  
459 genes and their relationship with antibiotics in the Huangpu River and the drinking  
460 water sources, Shanghai, China. *Sci Total Environ* **2013**; 458-460: 267-72.
- 461 30. Chen K, Zhou JL. Occurrence and behavior of antibiotics in water and sediments  
462 from the Huangpu River, Shanghai, China. *Chemosphere* **2014**; 95: 604-12.

- 463 31. Jiang L, Hu X, Yin D, Zhang H, Yu Z. Occurrence, distribution and seasonal variation  
464 of antibiotics in the Huangpu River, Shanghai, China. *Chemosphere* **2011**; 82(6):  
465 822-8.
- 466 32. Chen CQ, Zheng L, Zhou JL, Zhao H. Persistence and risk of antibiotic residues and  
467 antibiotic resistance genes in major mariculture sites in Southeast China. *Sci Total*  
468 *Environ* **2017**; 580: 1175-84.
- 469 33. Zhu F, Wang S, Liu Y, Wu M, Wang H, Xu G. Antibiotics in the surface water of  
470 Shanghai, China: screening, distribution, and indicator selecting. *Environ Sci Pollut*  
471 *Res Int* **2021**; 28(8): 9836-48.
- 472 34. Jiang L, Hu X, Yin D, Zhang H, Yu Z. Occurrence, distribution and seasonal variation  
473 of antibiotics in the Huangpu River, Shanghai, China. *Chemosphere (Oxford)* **2011**;  
474 82(6): 822-8.
- 475 35. Hanamoto S, Nakada N, Jürgens MD, Johnson AC, Yamashita N, Tanaka H. The  
476 different fate of antibiotics in the Thames River, UK, and the Katsura River, Japan.  
477 *Environmental Science and Pollution Research* **2018**; 25(2): 1903-13.
- 478 36. Karthikeyan KG, Meyer MT. Occurrence of antibiotics in wastewater treatment  
479 facilities in Wisconsin, USA. *Science of The Total Environment* **2006**; 361(1): 196-  
480 207.
- 481 37. Coveney MF, Wetzel RG. Effects of nutrients on specific growth rate of  
482 bacterioplankton in oligotrophic lake water cultures. *Appl Environ Microbiol* **1992**;  
483 58(1): 150-6.
- 484 38. Wang L, Miller TD, Priscu JC. Bacterioplankton nutrient deficiency in a eutrophic  
485 lake. *Archiv für Hydrobiologie* **1992**; 125(4): 423-39.
- 486 39. Ali L, Wang YQ, Zhang J, et al. Nutrient-induced antibiotic resistance in  
487 *Enterococcus faecalis* in the eutrophic environment. *J Glob Antimicrob Resist* **2016**;  
488 7: 78-83.

- 489 40. Wang Z, Han M, Li E, et al. Distribution of antibiotic resistance genes in an  
490 agriculturally disturbed lake in China: Their links with microbial communities,  
491 antibiotics, and water quality. *Journal of Hazardous Materials* **2020**; 393: 122426.
- 492 41. Ghosh A, Singh A, Ramteke PW, Singh VP. Characterization of large plasmids  
493 encoding resistance to toxic heavy metals in *Salmonella abortus equi*. *Biochem*  
494 *Biophys Res Commun* **2000**; 272(1): 6-11.
- 495 42. Alshammari H, Neilands J, Svensäter G, Stavropoulos A. Antimicrobial Potential of  
496 Strontium Hydroxide on Bacteria Associated with Peri-Implantitis. *Antibiotics (Basel)*  
497 **2021**; 10(2): 150.
- 498 43. Baheiraei N, Eyni H, Bakhshi B, Najafloo R, Rabiee N. Effects of strontium ions with  
499 potential antibacterial activity on in vivo bone regeneration. *Scientific Reports* **2021**;  
500 11(1): 8745.
- 501 44. Xie Y, Yang L. Calcium and Magnesium Ions Are Membrane-Active against  
502 Stationary-Phase *Staphylococcus aureus* with High Specificity. *Sci Rep* **2016**; 6:  
503 20628.
- 504 45. Gokulan K, Khare S, Cerniglia CE, Foley SL, Varughese KI. Structure and Inhibitor  
505 Specificity of L,D-Transpeptidase (LdtMt2) from *Mycobacterium tuberculosis* and  
506 Antibiotic Resistance: Calcium Binding Promotes Dimer Formation. *AAPS J* **2018**;  
507 20(2): 44.
- 508

Table 1: Water Quality Rank (according to Environmental Quality Standard for Surface Water of PRC [28]) and Concentration ( $\mu\text{g/L}$ ) of Dissolved Elements. Rank I is applicable for national nature reserves. Rank II is for first-class drinking water reserves. Rank III is for second-class drinking water reserves. Rank IV is for industry water and non-exposure entertainment water sources. Rank V is for agricultural water sources.

| Sample | Area      | P   |         | Cu |       | Zn |        | As |       | Se |       | Hg |       | Cd |       | Pb |       | Cr |       |
|--------|-----------|-----|---------|----|-------|----|--------|----|-------|----|-------|----|-------|----|-------|----|-------|----|-------|
| S1     | Qingpu    | III | 128.006 |    | 0.174 |    | ND     |    | 4.386 |    | ND    |    | 0.047 |    | 0.018 |    | 2.922 |    | 0.973 |
| S2     | Qingpu    | III | 136.442 |    | 0.427 |    | ND     |    | 4.345 |    | ND    |    | 0.025 |    | 0.012 |    | 0.791 |    | 1.28  |
| S3     | Qingpu    | II  | 94.828  |    | 0.433 |    | 7.425  |    | 4.288 |    | ND    |    | 0.021 |    | 0.026 |    | 1.372 |    | 0.742 |
| S4     | Qingpu    | II  | 79.516  |    | 0.056 |    | 1.762  |    | 5.011 |    | ND    |    | 0.034 |    | 0.021 |    | 2.112 |    | 0.752 |
| S5     | Kunshan   | II  | 37.645  |    | ND    |    | ND     |    | 2.329 |    | ND    |    | ND    |    | 0.017 |    | 1.914 |    | 0.522 |
| S7     | Jinshan   | V   | 458.891 |    | ND    |    | 5.135  |    | 3.743 |    | ND    |    | ND    |    | 0.004 |    | 0.668 |    | 2.074 |
| S8*    | Songjiang | IV  | 237.872 |    | ND    |    | 2.272  |    | 3.626 |    | 0.535 |    | ND    |    | 0.011 |    | 0.831 |    | 0.6   |
| S9     | Songjiang | III | 180.972 |    | 0.529 |    | 3.414  |    | 3.276 |    | ND    |    | ND    |    | 0.023 |    | 1.205 |    | 1.33  |
| S10    | Kunshan   | II  | 34.28   |    | ND    |    | ND     |    | 2.359 |    | ND    |    | ND    |    | ND    |    | 0.457 |    | ND    |
| S11    | Kunshan   | II  | 30.058  |    | ND    |    | ND     |    | 2.442 |    | ND    |    | ND    |    | 0.005 |    | 0.642 |    | ND    |
| S12*   | Kunshan   | II  | 45.482  |    | ND    |    | 9.226  |    | 2.708 |    | ND    |    | ND    |    | ND    |    | 0.332 |    | 0.264 |
| S13*   | Kunshan   | II  | 24.372  |    | ND    |    | ND     |    | 2.217 |    | ND    |    | ND    |    | 0.004 |    | 0.646 |    | 0.113 |
| S14    | Kunshan   | IV  | 258.324 |    | 0.275 |    | 0.72   |    | 2.712 |    | ND    |    | ND    |    | 0.022 |    | 0.967 |    | 0.351 |
| S15    | Kunshan   | III | 114.272 |    | 2.07  |    | 11.143 |    | 2.309 |    | ND    |    | ND    |    | 0.031 |    | 2.364 |    | 1.125 |

509  
510

\*Labelled samples are from drinking water reserves. ND: Not detected.

Table 2: Additional requirements from Environmental Quality Standard for Surface Water of PRC for drinking water reserves.

| Sample | Area      | Mo      | Co      | Be   | B         | Sb      | Ni      | Ba   | Ti      | V       | TI   | Fe               |
|--------|-----------|---------|---------|------|-----------|---------|---------|------|---------|---------|------|------------------|
| S8     | Songjiang | W 3.538 | W 0.326 | W ND | W 99.268  | W 0.751 | W 0.548 | W ND | W 6.237 | W 2.632 | W ND | <b>E</b> 417.436 |
| S12    | Kunshan   | W 3.302 | W 0.153 | W ND | W 119.726 | W 1.407 | W 1.998 | W ND | W 1.985 | W 2.021 | W ND | W 153.924        |
| S13    | Kunshan   | W 2.453 | W 0.075 | W ND | W 115.066 | W 0.742 | W 1.312 | W ND | W 0.596 | W 0.856 | W ND | W 61.913         |

511 “W” means concentration is within the limit for drinking water reserves, and “E” means exceeding the requirement; ND: Not  
 512 detected.



Table 3: Concentrations of amoxicillin and tetracycline (unit: µg/L).

| <b>Sample</b> | <b>Area</b> | <b>Amoxicillin</b> | <b>Tetracycline</b> |
|---------------|-------------|--------------------|---------------------|
| S1            | Qingpu      | ND                 | ND                  |
| S2            | Qingpu      | ND                 | ND                  |
| S3            | Qingpu      | ND                 | ND                  |
| S4            | Qingpu      | ND                 | ND                  |
| S5            | Kunshan     | ND                 | ND                  |
| S6            | Songjiang   | ND                 | ND                  |
| S7            | Jinshan     | ND                 | ND                  |
| S8            | Songjiang   | ND                 | ND                  |
| S9            | Songjiang   | ND                 | ND                  |
| S10           | Kunshan     | ND                 | ND                  |
| S11           | Kunshan     | ND                 | ND                  |
| S12           | Kunshan     | ND                 | ND                  |
| S13           | Kunshan     | ND                 | ND                  |
| S14           | Kunshan     | ND                 | ND                  |
| S15           | Kunshan     | ND                 | ND                  |

513 ND: Not detected. Detection limit: 1 µg/L.

514

515 **Figure Legend**

516

517 Figure 1: Map of sampling area. (a) Map of China with population density in 2020.

518 Unit of population density: persons/square kilometre. The blue line represents the

519 Yangtze River. (b) Spatial distribution of samples and absolute abundance of total

520 ARGs in each sample. Unit of total ARG abundance: copies/mL. The black dash

521 represents the sampling lane.

522

523 Figure 2: Mean absolute abundance of ARGs in the four sampling regions. Unit of

524 ARG abundance: copies/mL.

525

526 Figure 3: Heatmap of correlation of ARG concentrations and environmental

527 parameters.

528

529 Figure 4: Linear regression of dissolved elements with ARGs (a) Calcium and *ampr*.

530 (b) Phosphorus and *tetO*. (c) Chromium and *tetO*. (d) Manganese and *tetO*. Unit:

531 *tetO* (copies/mL). Unit: *ampr* (copies/mL), *tetO* (copies/mL), calcium (mg/L),

532 phosphorus ( $\mu\text{g/L}$ ), chromium ( $\mu\text{g/L}$ ), manganese ( $\mu\text{g/L}$ ), strontium ( $\mu\text{g/L}$ ).

533

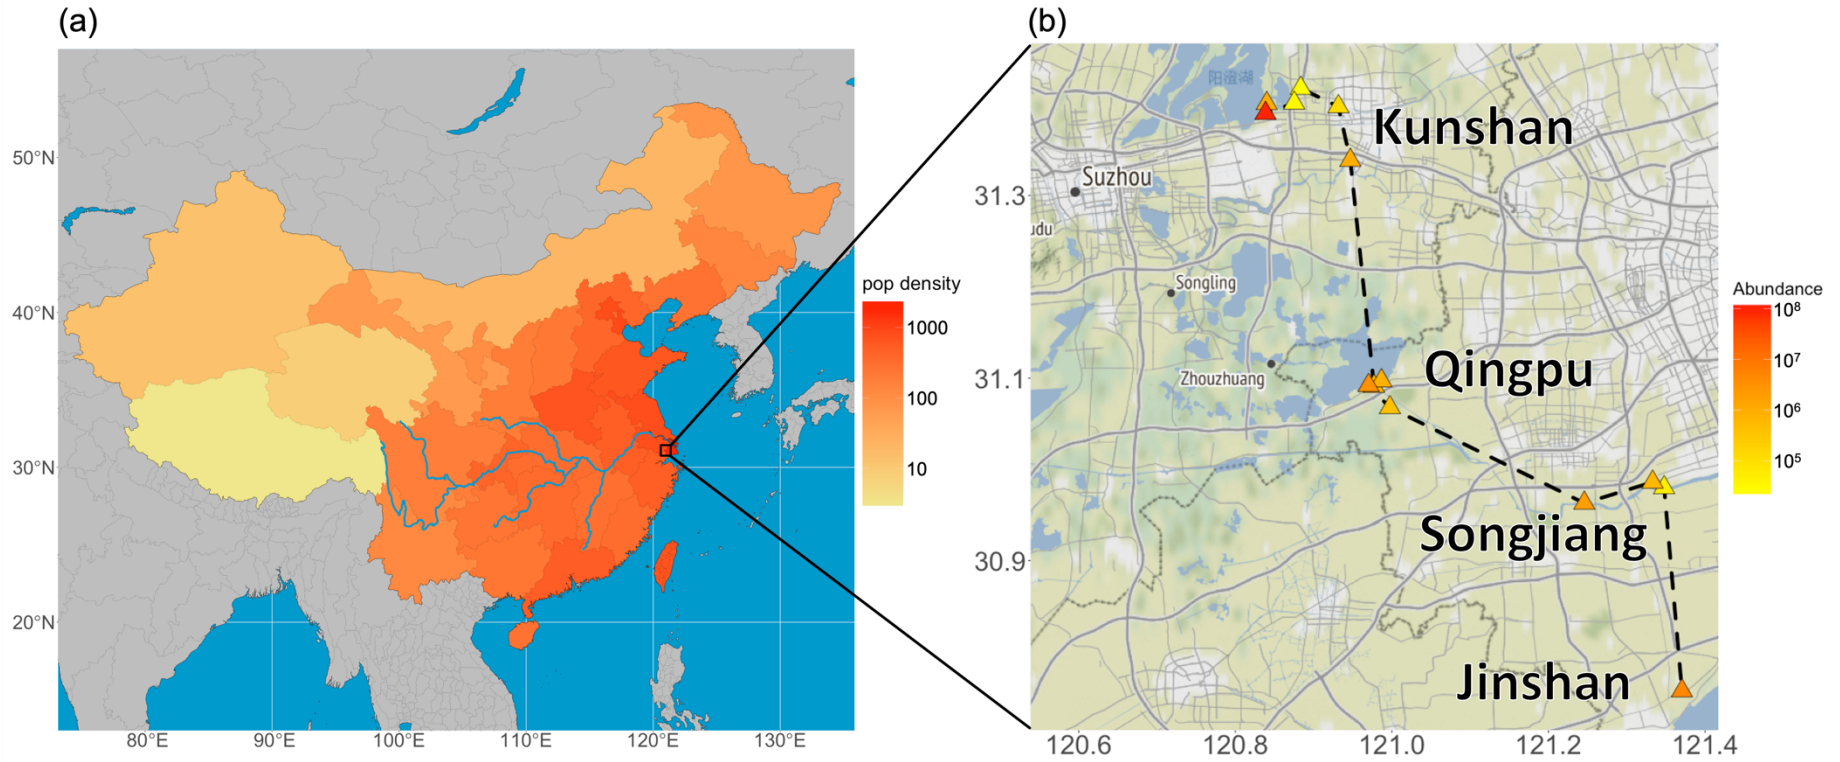

534

535

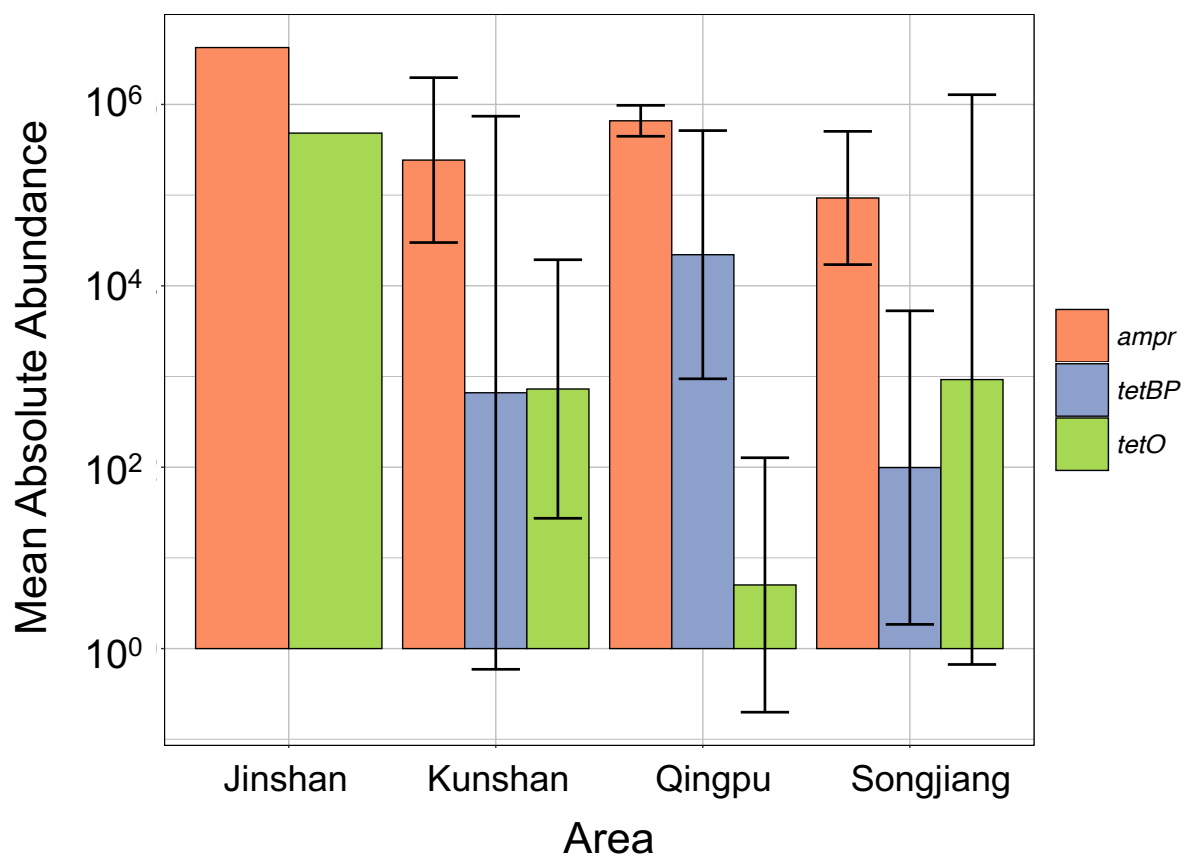

536

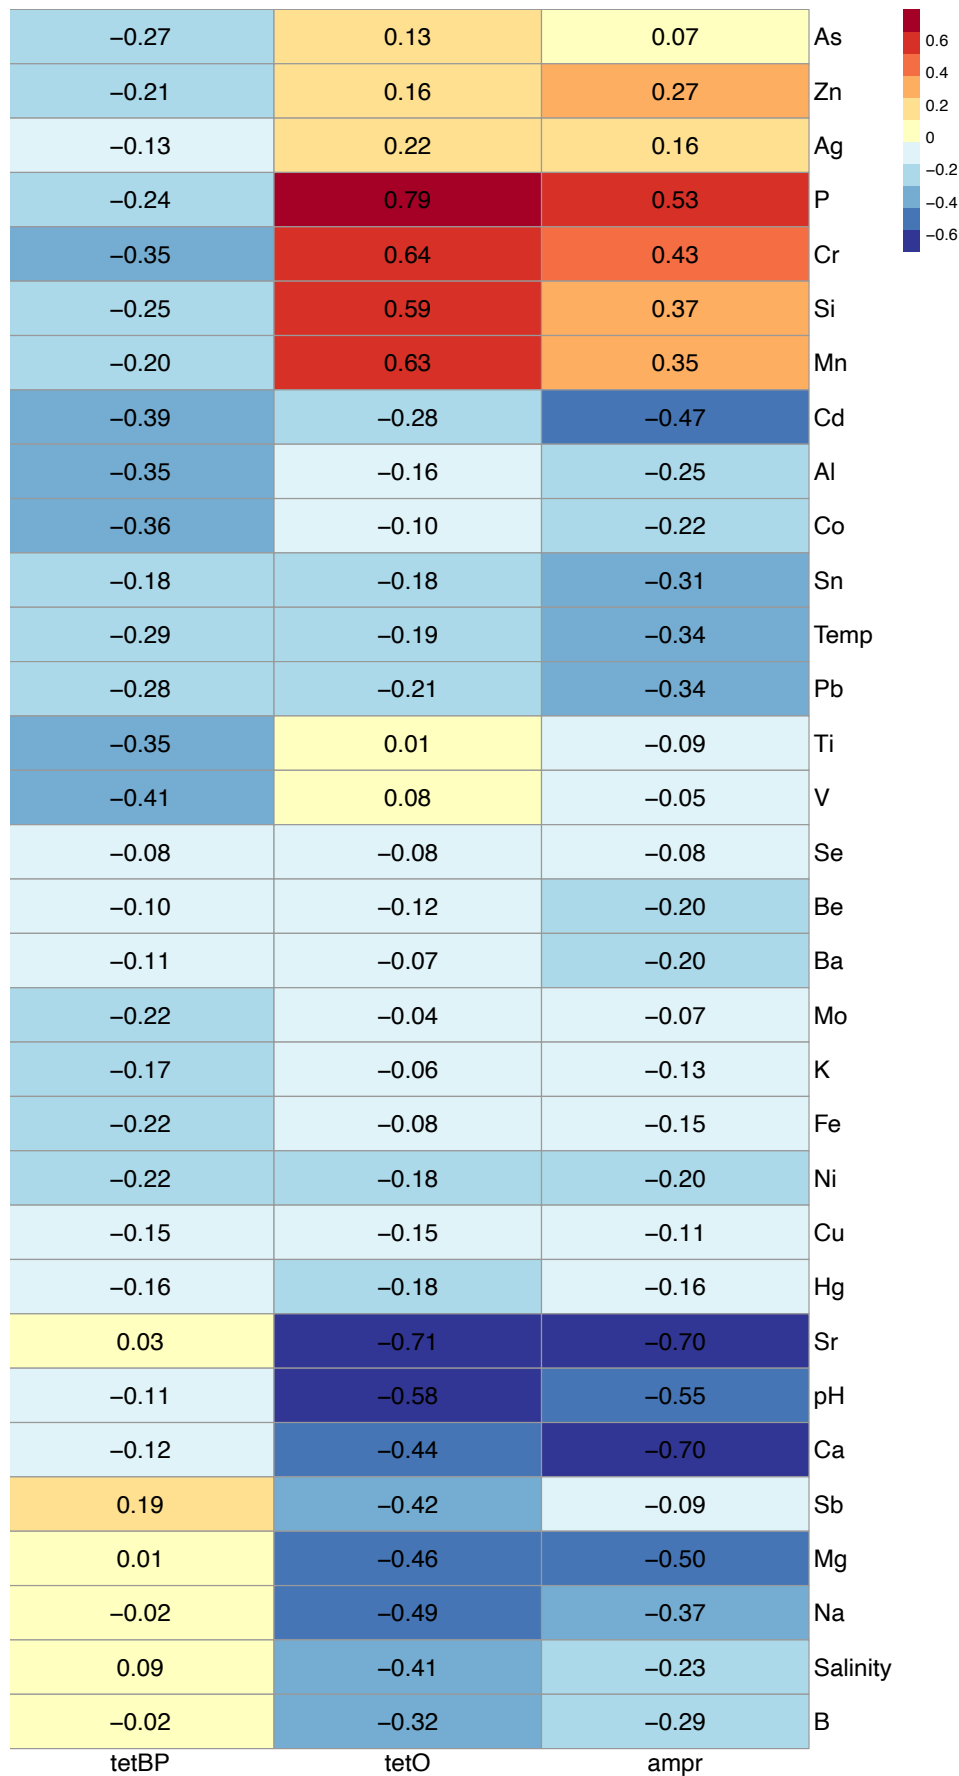

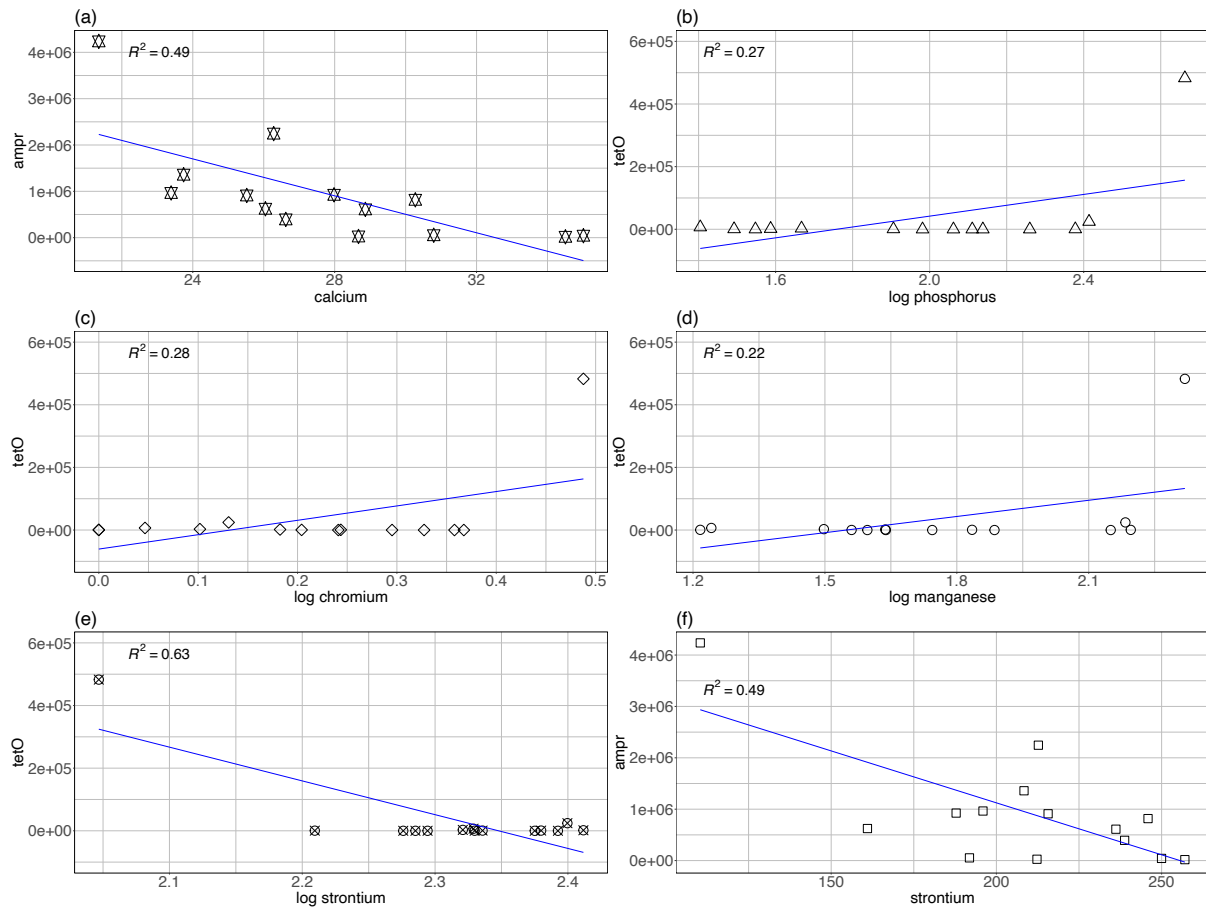

538
